# Supplementary material for: Mechanism of the thermal decomposition of tetramethylsilane: a flash pyrolysis vacuum ultraviolet photoionization time-of-flight mass spectrometry and density functional theory study
Source: Royal Society of Chemistry journal article supplement (doi:10.1039/c8cp02626b), 2018-01-01
Supplement: c8cp02626b1.pdf [file c8cp02626b1.pdf]

TMS

|    |             |             |             |
|----|-------------|-------------|-------------|
| Si | 0.00000000  | 0.00000000  | 0.00000000  |
| C  | 1.09182800  | 1.09182800  | 1.09182800  |
| H  | 0.48848000  | 1.73755100  | 1.73755100  |
| H  | 1.73755100  | 1.73755100  | 0.48848000  |
| H  | 1.73755100  | 0.48848000  | 1.73755100  |
| C  | -1.09182800 | -1.09182800 | 1.09182800  |
| H  | -0.48848000 | -1.73755100 | 1.73755100  |
| H  | -1.73755100 | -1.73755100 | 0.48848000  |
| H  | -1.73755100 | -0.48848000 | 1.73755100  |
| C  | -1.09182800 | 1.09182800  | -1.09182800 |
| H  | -1.73755100 | 0.48848000  | -1.73755100 |
| H  | -0.48848000 | 1.73755100  | -1.73755100 |
| H  | -1.73755100 | 1.73755100  | -0.48848000 |
| C  | 1.09182800  | -1.09182800 | -1.09182800 |
| H  | 0.48848000  | -1.73755100 | -1.73755100 |
| H  | 1.73755100  | -0.48848000 | -1.73755100 |
| H  | 1.73755100  | -1.73755100 | -0.48848000 |

Me<sub>3</sub>Si·

|    |             |             |             |
|----|-------------|-------------|-------------|
| Si | 0.00000000  | 0.00000000  | 0.42339700  |
| C  | 0.00000000  | 1.79771500  | -0.17647700 |
| H  | 0.00000000  | 1.83912300  | -1.27320000 |
| H  | -0.88353300 | 2.33499500  | 0.17810400  |
| H  | 0.88353300  | 2.33499500  | 0.17810400  |
| C  | 1.55686700  | -0.89885800 | -0.17647700 |
| H  | 1.58039800  | -1.93266000 | 0.17810400  |
| H  | 1.59272700  | -0.91956100 | -1.27320000 |
| H  | 2.46393100  | -0.40233500 | 0.17810400  |
| C  | -1.55686700 | -0.89885800 | -0.17647700 |
| H  | -1.59272700 | -0.91956100 | -1.27320000 |
| H  | -1.58039800 | -1.93266000 | 0.17810400  |
| H  | -2.46393100 | -0.40233500 | 0.17810400  |

Me<sub>2</sub>Si=CH<sub>2</sub>

|    |             |             |             |
|----|-------------|-------------|-------------|
| Si | 0.00704800  | 0.11786500  | -0.00001600 |
| C  | 0.12359600  | 1.82213200  | -0.00027500 |
| H  | -0.74644900 | 2.46968200  | -0.00026100 |
| H  | 1.07965800  | 2.33413100  | -0.00046500 |
| C  | -1.63897200 | -0.79651500 | 0.00029800  |
| H  | -1.48757700 | -1.87873400 | 0.00066900  |
| H  | -2.23091600 | -0.53793300 | 0.88195400  |
| H  | -2.23092100 | -0.53854500 | -0.88153400 |
| C  | 1.51846600  | -0.99512800 | -0.00003000 |
| H  | 1.53401800  | -1.64289500 | 0.88168400  |

|                                                |             |             |             |
|------------------------------------------------|-------------|-------------|-------------|
| H                                              | 1.53375100  | -1.64324200 | -0.88149300 |
| H                                              | 2.43122400  | -0.39551300 | -0.00028400 |
| Me <sub>2</sub> Si:                            |             |             |             |
| Si                                             | 0.00000000  | 0.75548600  | 0.00000000  |
| C                                              | 1.44610800  | -0.49820200 | -0.01010900 |
| H                                              | 1.54378600  | -0.87849600 | 1.01941200  |
| H                                              | 1.26738700  | -1.37280000 | -0.64654900 |
| H                                              | 2.40495400  | -0.04789000 | -0.27718300 |
| C                                              | -1.44610800 | -0.49820200 | 0.01010900  |
| H                                              | -1.54378200 | -0.87849800 | -1.01941200 |
| H                                              | -1.26738800 | -1.37279800 | 0.64655200  |
| H                                              | -2.40495500 | -0.04789000 | 0.27717900  |
| TS (TMS → Me <sub>2</sub> Si=CH <sub>2</sub> ) |             |             |             |
| Si                                             | -0.17507100 | 0.08455200  | 0.26844100  |
| C                                              | 0.69464700  | -0.52077700 | 1.67187500  |
| H                                              | 0.40487000  | -1.44808800 | 2.15568000  |
| H                                              | 1.33971700  | 0.12605700  | 2.25776600  |
| H                                              | 1.26684100  | -0.75164500 | 0.09493300  |
| C                                              | 1.31226000  | -0.67046200 | -1.29015400 |
| H                                              | 2.27135600  | -0.15537300 | -1.38346200 |
| H                                              | 0.64589300  | -0.28729100 | -2.06999100 |
| H                                              | 1.44047600  | -1.74213100 | -1.46394900 |
| C                                              | -1.68353300 | -0.82534500 | -0.36806900 |
| H                                              | -1.91579100 | -0.59670400 | -1.41087800 |
| H                                              | -2.54613000 | -0.54277700 | 0.24473100  |
| H                                              | -1.55174500 | -1.90560800 | -0.26847700 |
| C                                              | -0.09722100 | 1.89729700  | -0.19673400 |
| H                                              | -0.33502900 | 2.07848400  | -1.24745600 |
| H                                              | -0.81878800 | 2.44681700  | 0.41718600  |
| H                                              | 0.89240000  | 2.31024400  | 0.01423200  |
| FS (TMS → Me <sub>2</sub> Si=CH <sub>2</sub> ) |             |             |             |
| Si                                             | -1.02447900 | -0.00007500 | 0.19434900  |
| C                                              | 0.14875300  | -0.00184800 | 1.43615300  |
| H                                              | 0.54609200  | -0.91801900 | 1.85932500  |
| H                                              | 0.54755200  | 0.91319500  | 1.86041200  |
| H                                              | 3.40320900  | 0.00475700  | -0.05145600 |
| C                                              | 4.42501800  | -0.00002500 | -0.43347300 |
| H                                              | 4.67346500  | 0.98795000  | -0.82455500 |
| H                                              | 4.51294800  | -0.73853200 | -1.23203600 |
| H                                              | 5.11501300  | -0.25441200 | 0.37263600  |
| C                                              | -1.72440100 | -1.57640600 | -0.54522100 |
| H                                              | -1.53432800 | -1.62802500 | -1.62145300 |
| H                                              | -2.80771000 | -1.63381500 | -0.40269000 |
| H                                              | -1.27103800 | -2.45185900 | -0.07550300 |

|                                                      |             |             |             |
|------------------------------------------------------|-------------|-------------|-------------|
| C                                                    | -1.72224000 | 1.57819500  | -0.54308500 |
| H                                                    | -1.53480200 | 1.62957100  | -1.61978200 |
| H                                                    | -2.80502000 | 1.63835600  | -0.39771300 |
| H                                                    | -1.26545500 | 2.45238100  | -0.07431000 |
| TS (TMS→ Me <sub>2</sub> Si:)                        |             |             |             |
| Si                                                   | 0.39405200  | 0.00001100  | -0.67634800 |
| C                                                    | -1.10961600 | -0.00003800 | 1.24571400  |
| H                                                    | -1.65249400 | 0.90480000  | 1.49761700  |
| H                                                    | -0.13145600 | -0.00003400 | 1.71681700  |
| H                                                    | -1.65247200 | -0.90490300 | 1.49756300  |
| C                                                    | -1.86096600 | 0.00002000  | -0.67983000 |
| H                                                    | -2.75763100 | 0.00001200  | -0.05836500 |
| H                                                    | -1.88285600 | -0.89322200 | -1.29836200 |
| H                                                    | -1.88284400 | 0.89329100  | -1.29832000 |
| C                                                    | 1.17734700  | 1.53358300  | 0.17466900  |
| H                                                    | 2.11636200  | 1.75125400  | -0.34661300 |
| H                                                    | 1.40563800  | 1.39832400  | 1.23968900  |
| H                                                    | 0.54714500  | 2.42178200  | 0.06743800  |
| C                                                    | 1.17735400  | -1.53358200 | 0.17462400  |
| H                                                    | 2.11635900  | -1.75125200 | -0.34667600 |
| H                                                    | 1.40566500  | -1.39833800 | 1.23964100  |
| H                                                    | 0.54714300  | -2.42177400 | 0.06739100  |
| FS (TMS→ Me <sub>2</sub> Si:)                        |             |             |             |
| Si                                                   | -1.02447900 | -0.00007500 | 0.19434900  |
| C                                                    | 0.14875300  | -0.00184800 | 1.43615300  |
| H                                                    | 0.54609200  | -0.91801900 | 1.85932500  |
| H                                                    | 0.54755200  | 0.91319500  | 1.86041200  |
| H                                                    | 3.40320900  | 0.00475700  | -0.05145600 |
| C                                                    | 4.42501800  | -0.00002500 | -0.43347300 |
| H                                                    | 4.67346500  | 0.98795000  | -0.82455500 |
| H                                                    | 4.51294800  | -0.73853200 | -1.23203600 |
| H                                                    | 5.11501300  | -0.25441200 | 0.37263600  |
| C                                                    | -1.72440100 | -1.57640600 | -0.54522100 |
| H                                                    | -1.53432800 | -1.62802500 | -1.62145300 |
| H                                                    | -2.80771000 | -1.63381500 | -0.40269000 |
| H                                                    | -1.27103800 | -2.45185900 | -0.07550300 |
| C                                                    | -1.72224000 | 1.57819500  | -0.54308500 |
| H                                                    | -1.53480200 | 1.62957100  | -1.61978200 |
| H                                                    | -2.80502000 | 1.63835600  | -0.39771300 |
| H                                                    | -1.26545500 | 2.45238100  | -0.07431000 |
| TS5a (Me <sub>2</sub> Si=CH <sub>2</sub> →:Si(Me)Et) |             |             |             |
| Si                                                   | -0.20702700 | 0.08305700  | -0.69648500 |
| C                                                    | 0.77341900  | 1.22030500  | 0.29291900  |
| H                                                    | 1.77529800  | 1.48107200  | -0.04335100 |

|                                                                                      |             |             |             |
|--------------------------------------------------------------------------------------|-------------|-------------|-------------|
| H                                                                                    | 0.51090200  | 1.70136100  | 1.24101200  |
| C                                                                                    | 1.35489900  | -0.96424000 | 0.24441000  |
| H                                                                                    | 0.78065800  | -1.88739200 | 0.35785700  |
| H                                                                                    | 2.16134000  | -1.08878900 | -0.47265400 |
| H                                                                                    | 1.75107000  | -0.70686400 | 1.22706500  |
| C                                                                                    | -1.76062900 | -0.22784000 | 0.39946500  |
| H                                                                                    | -2.46336900 | 0.59949700  | 0.24713000  |
| H                                                                                    | -2.28276900 | -1.14209400 | 0.10249400  |
| H                                                                                    | -1.54088600 | -0.28893700 | 1.47047200  |
| FS5a (Me <sub>2</sub> Si=CH <sub>2</sub> →:Si(Me)Et)                                 |             |             |             |
| Si                                                                                   | 0.68234700  | -0.77961200 | -0.25565700 |
| C                                                                                    | -0.95296100 | -0.28674500 | 0.63649400  |
| H                                                                                    | -1.48817400 | -1.18696900 | 0.95594600  |
| H                                                                                    | -0.75993900 | 0.31736500  | 1.53142900  |
| C                                                                                    | -1.85231500 | 0.51107500  | -0.34083300 |
| H                                                                                    | -1.38746600 | 1.45328600  | -0.64670500 |
| H                                                                                    | -2.07269000 | -0.05858600 | -1.25001000 |
| H                                                                                    | -2.81178300 | 0.75892300  | 0.12182700  |
| C                                                                                    | 1.68333500  | 0.81576700  | 0.08212600  |
| H                                                                                    | 2.04610100  | 0.73236600  | 1.11987900  |
| H                                                                                    | 2.56329000  | 0.92179200  | -0.55642500 |
| H                                                                                    | 1.08945200  | 1.73581700  | 0.03653400  |
| TS5b (Me <sub>2</sub> Si=CH <sub>2</sub> →H <sub>2</sub> C(H)Si(Me)CH <sub>2</sub> ) |             |             |             |
| Si                                                                                   | -0.05087600 | 0.03387200  | 0.14171700  |
| C                                                                                    | -0.88914100 | 1.57837000  | -0.09303800 |
| H                                                                                    | -1.91315200 | 1.68279400  | 0.25119400  |
| H                                                                                    | -0.47800500 | 2.46336800  | -0.56818000 |
| C                                                                                    | -0.93494500 | -1.54885500 | -0.24286200 |
| H                                                                                    | -0.80498200 | -2.38034700 | 0.44870200  |
| H                                                                                    | -0.63460300 | -0.35814100 | 1.50671600  |
| H                                                                                    | -1.92150900 | -1.53984800 | -0.70541000 |
| C                                                                                    | 1.80686400  | -0.05071800 | -0.08309500 |
| H                                                                                    | 2.28787900  | 0.84651000  | 0.31457700  |
| H                                                                                    | 2.22276900  | -0.92346400 | 0.42666000  |
| H                                                                                    | 2.05720400  | -0.13786000 | -1.14432900 |
| FS5b (Me <sub>2</sub> Si=CH <sub>2</sub> →H <sub>2</sub> C(H)Si(Me)CH <sub>2</sub> ) |             |             |             |
| Si                                                                                   | 0.23727700  | -0.00101100 | 0.49970000  |
| C                                                                                    | -1.26994500 | 0.78103600  | -0.25816300 |
| H                                                                                    | -2.01062200 | 1.25799000  | 0.37689800  |
| H                                                                                    | -1.19721400 | 1.25655600  | -1.23247600 |
| C                                                                                    | -1.27010300 | -0.77995500 | -0.26109400 |
| H                                                                                    | -2.01086000 | -1.25916900 | 0.37216900  |
| H                                                                                    | 0.33746700  | -0.00378200 | 1.97649100  |
| H                                                                                    | -1.19741300 | -1.25183100 | -1.23717800 |

|                                             |             |             |             |
|---------------------------------------------|-------------|-------------|-------------|
| C                                           | 1.88600400  | 0.00076900  | -0.39655800 |
| H                                           | 2.47360100  | 0.88672900  | -0.14101200 |
| H                                           | 2.47730400  | -0.88170600 | -0.13750000 |
| H                                           | 1.73012000  | -0.00173200 | -1.47830300 |
| TS5c (:Si(Me)Et→H <sub>2</sub> C=Si(H)Et)   |             |             |             |
| Si                                          | 0.77518500  | -0.67983500 | -0.19968500 |
| C                                           | -1.00132200 | -0.44640900 | 0.50034500  |
| H                                           | -1.49936900 | -1.42155800 | 0.51125200  |
| H                                           | -0.90659000 | -0.14125200 | 1.55044200  |
| C                                           | -1.86675600 | 0.56397100  | -0.27560100 |
| H                                           | -1.45583600 | 1.57497500  | -0.21255000 |
| H                                           | -1.93431800 | 0.30556600  | -1.33703500 |
| H                                           | -2.88877400 | 0.59517000  | 0.11570700  |
| C                                           | 1.66008900  | 0.81997900  | 0.24122000  |
| H                                           | 2.65473300  | 0.96946900  | -0.17680800 |
| H                                           | 1.07379600  | 0.36562300  | -1.34422600 |
| H                                           | 1.35170600  | 1.64444800  | 0.89303000  |
| FS5c (:Si(Me)Et→H <sub>2</sub> C=Si(H)Et)   |             |             |             |
| Si                                          | -0.67206800 | 0.39964000  | 0.13914400  |
| C                                           | 0.97222000  | -0.45506100 | 0.46622600  |
| H                                           | 1.22220000  | -0.32155000 | 1.52522300  |
| H                                           | 0.81738000  | -1.52928300 | 0.32287400  |
| C                                           | 2.14044600  | 0.04461500  | -0.40701200 |
| H                                           | 1.95195300  | -0.13395000 | -1.46884500 |
| H                                           | 2.30993100  | 1.11743200  | -0.27770100 |
| H                                           | 3.07048700  | -0.46738300 | -0.14425500 |
| C                                           | -2.12684000 | -0.39307000 | -0.28000600 |
| H                                           | -3.04603700 | 0.15472500  | -0.45556600 |
| H                                           | -0.62988900 | 1.87626300  | 0.25702500  |
| H                                           | -2.20202600 | -1.47012500 | -0.38202500 |
| TS5d (:Si(Me)Et→MeH <sub>2</sub> C=Si(H)Me) |             |             |             |
| Si                                          | 0.55667800  | -0.67306200 | -0.08491400 |
| C                                           | -0.83795800 | 0.49002000  | -0.04268400 |
| H                                           | -0.23011100 | -0.54929300 | 1.26917300  |
| H                                           | -0.70029900 | 1.57855400  | -0.06688300 |
| C                                           | -2.27849600 | 0.08780900  | -0.00074300 |
| H                                           | -2.74726900 | 0.36357300  | -0.95445300 |
| H                                           | -2.40471200 | -0.98991100 | 0.13451900  |
| H                                           | -2.83352000 | 0.62104700  | 0.77890500  |
| C                                           | 2.09691300  | 0.46987900  | 0.02686700  |
| H                                           | 2.13360100  | 1.01303500  | 0.97643600  |
| H                                           | 3.02146600  | -0.10528400 | -0.06382400 |
| H                                           | 2.08460500  | 1.20490500  | -0.78571500 |
| FS5d (:Si(Me)Et→MeH <sub>2</sub> C=Si(H)Me) |             |             |             |

|                                                            |             |             |             |
|------------------------------------------------------------|-------------|-------------|-------------|
| Si                                                         | -0.50988700 | 0.41415600  | -0.00006900 |
| C                                                          | 0.93479300  | -0.51098500 | -0.00003300 |
| H                                                          | -0.45496500 | 1.89480600  | 0.00011400  |
| H                                                          | 0.82794300  | -1.59492600 | -0.00018300 |
| C                                                          | 2.35352900  | -0.00296600 | 0.00005400  |
| H                                                          | 2.90450000  | -0.35712000 | -0.87976000 |
| H                                                          | 2.40417600  | 1.08935500  | 0.00012500  |
| H                                                          | 2.90439400  | -0.35721500 | 0.87989900  |
| C                                                          | -2.23409100 | -0.32487300 | 0.00006300  |
| H                                                          | -2.79826400 | -0.01364200 | 0.88343700  |
| H                                                          | -2.79958300 | -0.01087700 | -0.88148500 |
| H                                                          | -2.17517100 | -1.41562500 | -0.00168000 |
| TS5e (:Si(Me)Et→H <sub>2</sub> C(H)Si(Me)CH <sub>2</sub> ) |             |             |             |
| Si                                                         | 0.38066100  | -0.78626400 | -0.19820300 |
| C                                                          | -1.20675900 | -0.04948100 | 0.77523400  |
| H                                                          | -1.95171000 | -0.79309700 | 1.03360500  |
| H                                                          | -0.84747900 | 0.52746400  | 1.62122000  |
| C                                                          | -1.34974400 | 0.63723300  | -0.47675500 |
| H                                                          | -0.96028900 | 1.63961300  | -0.60226100 |
| H                                                          | -0.31225900 | -0.22864700 | -1.49070100 |
| H                                                          | -2.14824300 | 0.36265500  | -1.15567800 |
| C                                                          | 1.70455300  | 0.57714400  | 0.14947100  |
| H                                                          | 2.28196500  | 0.29037600  | 1.03549200  |
| H                                                          | 2.41288200  | 0.63855600  | -0.68298700 |
| H                                                          | 1.30758100  | 1.58140600  | 0.32845400  |
| FS5e (:Si(Me)Et→H <sub>2</sub> C(H)Si(Me)CH <sub>2</sub> ) |             |             |             |
| Si                                                         | 0.23738500  | -0.00147900 | 0.49920500  |
| C                                                          | -1.27026600 | 0.78123400  | -0.25721300 |
| H                                                          | -2.01044800 | 1.25781700  | 0.37869500  |
| H                                                          | -1.19805100 | 1.25751700  | -1.23119300 |
| C                                                          | -1.27035000 | -0.77965500 | -0.26173100 |
| H                                                          | -1.19876900 | -1.25047900 | -1.23839500 |
| H                                                          | 0.33616000  | -0.00603100 | 1.97609500  |
| H                                                          | -2.01033300 | -1.25961800 | 0.37187600  |
| C                                                          | 1.88648200  | 0.00117900  | -0.39616300 |
| H                                                          | 2.47536100  | 0.88530800  | -0.13726500 |
| H                                                          | 2.47638200  | -0.88309900 | -0.14005100 |
| H                                                          | 1.73111100  | 0.00273900  | -1.47799400 |
| TS5f (H <sub>2</sub> C=Si(H)Et→:Si(H)Pr)                   |             |             |             |
| Si                                                         | -1.30517400 | -0.44767100 | 0.08247200  |
| C                                                          | 0.77076100  | -0.51644200 | -0.51348500 |
| H                                                          | 0.74729600  | -1.60299600 | -0.39249600 |
| H                                                          | 0.83921800  | -0.30212000 | -1.57764000 |
| C                                                          | 1.91497800  | 0.05983700  | 0.31621300  |

|                                                           |             |             |             |
|-----------------------------------------------------------|-------------|-------------|-------------|
| H                                                         | 2.83763900  | -0.49765800 | 0.11529500  |
| H                                                         | 2.10419400  | 1.11233400  | 0.09690000  |
| H                                                         | 1.70885800  | -0.02848600 | 1.38594300  |
| C                                                         | -0.67383900 | 1.22343300  | -0.11899700 |
| H                                                         | -0.41995300 | 1.95549500  | 0.65014300  |
| H                                                         | -1.12737300 | -0.56933600 | 1.58897000  |
| H                                                         | -0.48884000 | 1.59919800  | -1.12410700 |
| FS5f (H <sub>2</sub> C=Si(H)Et→:Si(H)Pr)                  |             |             |             |
| Si                                                        | 1.57008300  | -0.32553000 | 0.03150200  |
| C                                                         | -0.76057500 | 0.11536600  | 0.56029600  |
| H                                                         | -0.23201700 | -0.80765800 | 0.96105400  |
| H                                                         | -1.04662600 | 0.62148100  | 1.48528200  |
| C                                                         | -1.97966700 | -0.37789100 | -0.21791500 |
| H                                                         | -2.57904200 | -1.07692300 | 0.37159100  |
| H                                                         | -2.61499800 | 0.46812800  | -0.49462300 |
| H                                                         | -1.67173700 | -0.88446000 | -1.13578900 |
| C                                                         | 0.21619100  | 0.99405900  | -0.25905600 |
| H                                                         | -0.13576100 | 1.14408400  | -1.27859600 |
| H                                                         | 1.03854000  | -1.25330000 | -1.06318000 |
| H                                                         | 0.40478100  | 1.95686900  | 0.21328600  |
| TS5g (H <sub>2</sub> C(H)Si(Me)CH <sub>2</sub> →:Si(H)Pr) |             |             |             |
| Si                                                        | 0.24191300  | -1.09200900 | -0.05773800 |
| C                                                         | 1.35014100  | 0.51500000  | -0.14235000 |
| H                                                         | 2.09092900  | 0.53559900  | 0.65098300  |
| H                                                         | 1.76835100  | 0.71117000  | -1.12546900 |
| C                                                         | 0.09677300  | 1.19807800  | 0.16161400  |
| H                                                         | -0.28048200 | 1.90587700  | -0.56604800 |
| H                                                         | 0.23241200  | -1.15300800 | 1.46811200  |
| H                                                         | -0.06315500 | 1.49666900  | 1.18963700  |
| C                                                         | -1.62707600 | 0.16731100  | -0.09473900 |
| H                                                         | -2.08193500 | -0.70690300 | 0.37711600  |
| H                                                         | -2.07342400 | 1.02140100  | 0.41486000  |
| H                                                         | -1.89851400 | 0.19498400  | -1.14801200 |
| FS5g (H <sub>2</sub> C(H)Si(Me)CH <sub>2</sub> →:Si(H)Pr) |             |             |             |
| Si                                                        | 1.68653000  | -0.33552400 | -0.02513900 |
| C                                                         | 0.19829900  | 0.83877900  | -0.27661200 |
| H                                                         | 0.62489100  | 1.77022100  | 0.15073500  |
| H                                                         | 0.07823500  | 1.06423300  | -1.34378200 |
| C                                                         | -1.16092000 | 0.54365200  | 0.37741300  |
| H                                                         | -1.83694500 | 1.39621800  | 0.23676800  |
| H                                                         | 1.24935700  | -0.81935900 | 1.36330600  |
| H                                                         | -1.02368400 | 0.42916100  | 1.45761300  |
| C                                                         | -1.82417300 | -0.71694100 | -0.18667100 |
| H                                                         | -1.20992200 | -1.60505200 | 0.00194700  |

|                                                                                         |             |             |             |
|-----------------------------------------------------------------------------------------|-------------|-------------|-------------|
| H                                                                                       | -2.80204800 | -0.89415500 | 0.26920700  |
| H                                                                                       | -1.97054400 | -0.63686200 | -1.26862100 |
| TS (:Si(Me)Et→:Si(Me)CH=CH <sub>2</sub> +H <sub>2</sub> )                               |             |             |             |
| Si                                                                                      | 0.40993100  | -0.83808200 | -0.10949600 |
| C                                                                                       | -1.26994400 | -0.03320000 | 0.53480900  |
| H                                                                                       | -2.08664000 | -0.71740900 | 0.74473600  |
| H                                                                                       | -1.05089500 | 0.63157700  | 1.60206900  |
| C                                                                                       | -1.11978300 | 0.50751700  | -0.77815600 |
| H                                                                                       | -0.52657900 | 1.39933500  | -0.92819100 |
| H                                                                                       | -1.90923000 | 0.35971300  | -1.50792200 |
| H                                                                                       | -1.85309900 | 1.00931200  | 1.66004000  |
| C                                                                                       | 1.68337500  | 0.59932900  | 0.14274100  |
| H                                                                                       | 2.38428200  | 0.31016400  | 0.93406100  |
| H                                                                                       | 2.27991500  | 0.72182900  | -0.76869800 |
| H                                                                                       | 1.26132900  | 1.57674600  | 0.40048000  |
| FS (:Si(Me)Et→:Si(Me)CH=CH <sub>2</sub> +H <sub>2</sub> )                               |             |             |             |
| Si                                                                                      | -1.00653700 | -0.17629900 | -0.72061500 |
| C                                                                                       | 0.76006000  | -0.78355400 | -0.36434400 |
| H                                                                                       | 1.31332900  | -1.19384200 | -1.21135100 |
| H                                                                                       | 4.26190800  | 2.74849800  | -0.76783500 |
| C                                                                                       | 1.30793900  | -0.96498600 | 0.84847800  |
| H                                                                                       | 0.82588400  | -0.62282400 | 1.76023200  |
| H                                                                                       | 2.25508800  | -1.48216600 | 0.98865900  |
| H                                                                                       | 4.74797100  | 3.28028500  | -0.95418600 |
| C                                                                                       | -1.28445300 | 1.03738300  | 0.73093800  |
| H                                                                                       | -0.91223500 | 2.01135300  | 0.37510200  |
| H                                                                                       | -2.34793600 | 1.17270700  | 0.94472900  |
| H                                                                                       | -0.75377100 | 0.82111200  | 1.66283200  |
| TS (H <sub>2</sub> C=Si(H)Et→H <sub>2</sub> C=Si(H)CH=CH <sub>2</sub> +H <sub>2</sub> ) |             |             |             |
| Si                                                                                      | 0.73509400  | -0.42992900 | 0.02125400  |
| C                                                                                       | -0.86954100 | 0.39066000  | -0.04854300 |
| H                                                                                       | -2.70702100 | 2.01573200  | 0.31383200  |
| H                                                                                       | -0.87556400 | 1.47541600  | -0.14629100 |
| C                                                                                       | -2.19409400 | -0.22907900 | -0.03815400 |
| H                                                                                       | -2.24415700 | -1.18781800 | -0.56911600 |
| H                                                                                       | -2.61139400 | -0.38624600 | 0.95976800  |
| H                                                                                       | -2.89499400 | 0.62672500  | -0.35351600 |
| C                                                                                       | 2.21091300  | 0.47434400  | -0.01213300 |
| H                                                                                       | 3.18663600  | 0.00660300  | 0.05508200  |
| H                                                                                       | 0.75288100  | -1.90471700 | 0.09606600  |
| H                                                                                       | 2.21862000  | 1.55776300  | -0.06040000 |
| FS (H <sub>2</sub> C=Si(H)Et→H <sub>2</sub> C=Si(H)CH=CH <sub>2</sub> +H <sub>2</sub> ) |             |             |             |
| Si                                                                                      | -0.96155300 | -0.11023300 | 0.20009400  |
| C                                                                                       | 0.77506300  | -0.40065500 | -0.35137200 |



|                                        |             |             |             |
|----------------------------------------|-------------|-------------|-------------|
| H                                      | 6.37396300  | 3.21477000  | 0.23126800  |
| H                                      | 1.25849400  | 0.38022800  | -0.93567500 |
| C                                      | 1.46680800  | -1.51335600 | -0.07267500 |
| H                                      | 1.04066900  | -2.32871300 | 0.50567800  |
| H                                      | 2.48883900  | -1.65524500 | -0.41139600 |
| H                                      | 5.86851700  | 3.26422300  | 0.77519600  |
| C                                      | -1.85949800 | 1.30291900  | -0.14710100 |
| H                                      | -2.87944700 | 1.43337300  | 0.19601300  |
| H                                      | -1.52871500 | -1.22698500 | 0.98688600  |
| H                                      | -1.45481600 | 2.12816200  | -0.72239400 |
| TS (:Si(H)Pr→:Si=CHEt+H <sub>2</sub> ) |             |             |             |
| Si                                     | 1.76706400  | -0.31302100 | -0.16048100 |
| C                                      | 0.17596600  | 0.51005100  | 0.10629900  |
| H                                      | 1.57519100  | 1.15013600  | 0.58101700  |
| H                                      | -0.02629600 | 1.56805500  | -0.07425700 |
| C                                      | -1.05905300 | -0.23886700 | 0.55357000  |
| H                                      | -1.34483800 | 0.08669200  | 1.56240700  |
| H                                      | 2.35129900  | 1.22366300  | -0.14629900 |
| H                                      | -0.84219200 | -1.31113200 | 0.63636100  |
| C                                      | -2.24927000 | -0.01519700 | -0.39425200 |
| H                                      | -2.01594500 | -0.35870500 | -1.40559100 |
| H                                      | -3.13246100 | -0.55820400 | -0.04634000 |
| H                                      | -2.50951000 | 1.04586700  | -0.45425900 |
| FS (:Si(H)Pr→:Si=CHEt+H <sub>2</sub> ) |             |             |             |
| Si                                     | -0.07472100 | -1.93475600 | -0.19132600 |
| C                                      | -0.00464100 | -0.29462500 | 0.32106400  |
| H                                      | 6.86454700  | 1.11165900  | 0.43346900  |
| H                                      | 1.02188900  | -0.04389200 | 0.63770900  |
| C                                      | -0.96969100 | 0.86327200  | 0.43423000  |
| H                                      | -1.04567600 | 1.16587600  | 1.48664200  |
| H                                      | 6.67254800  | 1.21921700  | -0.27735900 |
| H                                      | -1.97543900 | 0.54818700  | 0.13713700  |
| C                                      | -0.55217800 | 2.08287400  | -0.40375700 |
| H                                      | -0.50303900 | 1.82715900  | -1.46524700 |
| H                                      | -1.26493400 | 2.90402200  | -0.28001000 |
| H                                      | 0.43525800  | 2.44522500  | -0.10299600 |
| TS6a (:Si=CHEt→:Si(H)CH=CHMe)          |             |             |             |
| Si                                     | 1.49440900  | -0.31580900 | -0.13282500 |
| C                                      | 0.31200300  | 0.98860300  | 0.04380800  |
| H                                      | 0.14570800  | 1.88620700  | -0.53585000 |
| C                                      | -0.69874300 | 0.09339000  | 0.50329500  |
| H                                      | -0.80673500 | -0.06796300 | 1.57435700  |
| H                                      | 0.41484600  | -1.17830700 | 0.68606000  |
| C                                      | -1.93023500 | -0.27460300 | -0.28690900 |

|                                                                                            |             |             |             |
|--------------------------------------------------------------------------------------------|-------------|-------------|-------------|
| H                                                                                          | -1.76120700 | -0.18306600 | -1.36064500 |
| H                                                                                          | -2.27026100 | -1.28876500 | -0.06006200 |
| H                                                                                          | -2.74223200 | 0.40888300  | -0.00546400 |
| FS6a (:Si=CH <sub>2</sub> →:Si(H)CH=CHMe)                                                  |             |             |             |
| Si                                                                                         | 1.91832500  | -0.00190000 | 0.00000600  |
| C                                                                                          | 0.10764000  | -0.50380100 | -0.00000800 |
| H                                                                                          | -0.13602600 | -1.56877900 | -0.00002200 |
| C                                                                                          | -0.93723100 | 0.35282600  | -0.00001400 |
| H                                                                                          | -0.72768400 | 1.42234200  | -0.00000300 |
| H                                                                                          | 1.61457500  | 1.50040800  | -0.00002100 |
| C                                                                                          | -2.38628200 | -0.02076800 | 0.00000100  |
| H                                                                                          | -2.53126600 | -1.10248500 | -0.00027900 |
| H                                                                                          | -2.89036000 | 0.40252900  | 0.87679600  |
| H                                                                                          | -2.89055500 | 0.40304200  | -0.87642700 |
| TS6b (:Si(H)CH=CHMe→:Si(H)CH <sub>2</sub> CH=CH <sub>2</sub> )                             |             |             |             |
| Si                                                                                         | -1.81403800 | -0.21176900 | 0.01276400  |
| C                                                                                          | -0.12972800 | 0.52322900  | -0.05735700 |
| H                                                                                          | 0.08716300  | 1.59094800  | -0.01225700 |
| C                                                                                          | 1.05220500  | -0.33186200 | -0.06874300 |
| H                                                                                          | 0.85297700  | -1.40011900 | -0.16584000 |
| H                                                                                          | -2.53846800 | 1.13035000  | -0.09409600 |
| C                                                                                          | 2.41515500  | 0.03557000  | -0.04390000 |
| H                                                                                          | 2.71267700  | 1.07362300  | 0.04692200  |
| H                                                                                          | 1.07219300  | -0.06728800 | 1.07487400  |
| H                                                                                          | 3.18420000  | -0.72436900 | -0.00829700 |
| FS6b (:Si(H)CH=CHMe→:Si(H)CH <sub>2</sub> CH=CH <sub>2</sub> )                             |             |             |             |
| Si                                                                                         | -1.68475500 | -0.35018300 | -0.10815100 |
| C                                                                                          | -0.08015800 | 0.68105800  | 0.18206800  |
| H                                                                                          | 0.05483700  | 1.38565500  | -0.64842300 |
| C                                                                                          | 1.16120200  | -0.10920100 | 0.44445800  |
| H                                                                                          | 1.16306900  | -0.70590100 | 1.35580600  |
| H                                                                                          | -2.50922800 | 0.88127700  | -0.49602000 |
| C                                                                                          | 2.22772200  | -0.16873000 | -0.35378000 |
| H                                                                                          | 2.28489200  | 0.40510700  | -1.27434600 |
| H                                                                                          | -0.34082700 | 1.30923400  | 1.05309300  |
| H                                                                                          | 3.08123200  | -0.79156600 | -0.11247100 |
| TS6c (:Si(H)CH <sub>2</sub> CH=CH <sub>2</sub> →:Si=CHCH=CH <sub>2</sub> +H <sub>2</sub> ) |             |             |             |
| Si                                                                                         | 1.74041200  | -0.26017600 | -0.03901400 |
| C                                                                                          | 0.05476400  | 0.44512200  | -0.09245300 |
| H                                                                                          | -0.18073200 | 1.49515600  | -0.27424900 |
| C                                                                                          | -1.12829600 | -0.38888100 | 0.04956600  |
| H                                                                                          | -0.96320300 | -1.45675400 | 0.19126400  |
| H                                                                                          | 1.24908100  | 1.11527100  | 0.73142000  |
| C                                                                                          | -2.39376800 | 0.05992300  | -0.00069200 |

|                                                                                            |             |             |             |
|--------------------------------------------------------------------------------------------|-------------|-------------|-------------|
| H                                                                                          | -2.61559900 | 1.11632300  | -0.11560700 |
| H                                                                                          | 2.18711900  | 1.29063600  | 0.20557000  |
| H                                                                                          | -3.23863200 | -0.61514700 | 0.06927100  |
| FS6c (:Si(H)CH <sub>2</sub> CH=CH <sub>2</sub> →:Si=CHCH=CH <sub>2</sub> +H <sub>2</sub> ) |             |             |             |
| Si                                                                                         | 1.58862000  | -0.67608700 | 0.00009000  |
| C                                                                                          | 0.04733100  | 0.11609100  | -0.00051200 |
| H                                                                                          | 0.18806900  | 1.20897300  | -0.00180400 |
| C                                                                                          | -1.33556200 | -0.31267100 | 0.00037400  |
| H                                                                                          | -1.51571900 | -1.38617400 | 0.00168700  |
| H                                                                                          | 3.49297300  | 3.06468100  | 0.37334600  |
| C                                                                                          | -2.40669900 | 0.50044200  | -0.00028400 |
| H                                                                                          | -2.30052200 | 1.58048000  | -0.00157000 |
| H                                                                                          | 3.47899800  | 3.07031400  | -0.37086800 |
| H                                                                                          | -3.41489400 | 0.10376900  | 0.00047300  |
| TS7a (:SiMe <sub>2</sub> →Me(H)Si=CH <sub>2</sub> )                                        |             |             |             |
| Si                                                                                         | 0.09092800  | -0.63229900 | -0.09280000 |
| C                                                                                          | 1.43095000  | 0.56149800  | -0.04572000 |
| H                                                                                          | 1.39320700  | 1.65530900  | -0.08320200 |
| H                                                                                          | 0.94565000  | -0.54396500 | 1.22844600  |
| H                                                                                          | 2.44894900  | 0.18024300  | 0.02225600  |
| C                                                                                          | -1.51850300 | 0.39492600  | 0.03528200  |
| H                                                                                          | -1.50082400 | 1.23265400  | -0.66971000 |
| H                                                                                          | -2.40019800 | -0.21206000 | -0.18147300 |
| H                                                                                          | -1.63445700 | 0.80145800  | 1.04550400  |
| FS7a (:SiMe <sub>2</sub> →Me(H)Si=CH <sub>2</sub> )                                        |             |             |             |
| Si                                                                                         | -0.11460600 | 0.42199700  | -0.00000600 |
| C                                                                                          | -1.58320600 | -0.44951300 | 0.00000400  |
| H                                                                                          | -1.62536100 | -1.53313100 | -0.00001900 |
| H                                                                                          | -0.11903800 | 1.90214900  | 0.00001800  |
| H                                                                                          | -2.54425200 | 0.05248700  | 0.00002700  |
| C                                                                                          | 1.59206700  | -0.35043800 | 0.00000300  |
| H                                                                                          | 1.51612600  | -1.43992200 | -0.00054000 |
| H                                                                                          | 2.16212400  | -0.04448900 | -0.88169900 |
| H                                                                                          | 2.16172800  | -0.04535100 | 0.88226000  |
| TS7b (Me(H)Si=CH <sub>2</sub> →:Si(H)Et)                                                   |             |             |             |
| Si                                                                                         | 0.63982400  | -0.61041900 | -0.13412300 |
| C                                                                                          | 0.47252300  | 1.17783500  | 0.00409400  |
| H                                                                                          | 0.04476700  | 1.72815400  | -0.83252200 |
| H                                                                                          | 0.98491900  | -0.92317700 | 1.31146300  |
| H                                                                                          | 0.72181500  | 1.82651000  | 0.84734900  |
| C                                                                                          | -1.38730800 | -0.12145500 | 0.04113700  |
| H                                                                                          | -1.83515400 | -0.18397200 | -0.94690500 |
| H                                                                                          | -1.62816100 | -0.99447400 | 0.65373400  |
| H                                                                                          | -1.75702100 | 0.75454000  | 0.57321600  |

FS7b (Me(H)Si=CH<sub>2</sub>→:Si(H)Et)

|    |             |             |             |
|----|-------------|-------------|-------------|
| Si | 1.32536300  | -0.08070700 | -0.06892800 |
| C  | -0.44956500 | 0.61438900  | 0.07827900  |
| H  | -0.55918900 | 1.49255100  | -0.56796700 |
| H  | 0.99935400  | -1.42472000 | 0.59308600  |
| H  | -0.41977900 | 1.02974700  | 1.10588300  |
| C  | -1.66007600 | -0.32456700 | -0.05762000 |
| H  | -1.72077600 | -0.75150800 | -1.06313500 |
| H  | -1.59426800 | -1.15667000 | 0.64755400  |
| H  | -2.60258100 | 0.20156600  | 0.12561600  |

## TS7c (:Si(H)Et→:Si=CHMe)

|    |             |             |             |
|----|-------------|-------------|-------------|
| Si | -1.33842400 | 0.00682500  | -0.06501500 |
| C  | 0.39591100  | -0.49278800 | 0.08167500  |
| H  | 0.50184700  | -1.55983500 | 0.30477100  |
| H  | -0.72251000 | 1.53278000  | 0.15066100  |
| H  | -0.19239300 | 0.83375900  | 0.74665600  |
| C  | 1.74366700  | 0.17392900  | -0.06838700 |
| H  | 2.26006100  | -0.23957300 | -0.94253600 |
| H  | 1.65837200  | 1.25429700  | -0.22464100 |
| H  | 2.39508900  | -0.00381900 | 0.79558000  |

## FS7c (:Si(H)Et→:Si=CHMe)

|    |             |             |             |
|----|-------------|-------------|-------------|
| Si | 1.29787700  | -0.15616600 | 0.00002100  |
| C  | -0.38090200 | -0.52155900 | -0.00004100 |
| H  | -0.41658900 | -1.62839100 | -0.00020000 |
| H  | 0.64667500  | 2.67454500  | 0.37305400  |
| H  | 0.64638800  | 2.67455500  | -0.37321800 |
| C  | -1.74042200 | 0.12233800  | 0.00003000  |
| H  | -2.32233400 | -0.17568500 | 0.87988400  |
| H  | -1.67409600 | 1.21219100  | 0.00010400  |
| H  | -2.32237100 | -0.17556300 | -0.87984300 |

TS7d (:Si=CHMe→:Si(H)CH=CH<sub>2</sub>)

|    |             |             |             |
|----|-------------|-------------|-------------|
| Si | 1.03152500  | -0.10694000 | 0.03032400  |
| C  | -0.47799200 | 0.80752600  | -0.14160400 |
| H  | -0.73229300 | 1.79404600  | 0.21944000  |
| C  | -1.25532700 | -0.36902700 | 0.03225600  |
| H  | -1.83354800 | -0.56253700 | 0.94136100  |
| H  | -1.58361500 | -0.95684000 | -0.81933900 |
| H  | 0.10801400  | -1.40850900 | -0.10990400 |

FS7d (:Si=CHMe→:Si(H)CH=CH<sub>2</sub>)

|    |             |             |             |
|----|-------------|-------------|-------------|
| Si | 1.15891600  | -0.21978700 | -0.00002200 |
| C  | -0.56762200 | 0.54495100  | -0.00014900 |
| H  | -0.75492800 | 1.61813300  | -0.00005500 |
| C  | -1.63484900 | -0.27494700 | 0.00004300  |
| H  | -2.66057100 | 0.08823600  | 0.00030200  |

|                                                         |             |             |             |
|---------------------------------------------------------|-------------|-------------|-------------|
| H                                                       | -1.51457000 | -1.35679900 | 0.00008700  |
| H                                                       | 1.92007100  | 1.10743200  | 0.00060500  |
| TS7e (:Si(H)CH=CH <sub>2</sub> →:Si=C=CH <sub>2</sub> ) |             |             |             |
| Si                                                      | 1.23866900  | -0.16350200 | 0.04298600  |
| C                                                       | -0.51705800 | -0.00480100 | -0.05823600 |
| H                                                       | 0.36884400  | 1.26422800  | 0.09407600  |
| C                                                       | -1.83169500 | -0.03859800 | 0.01654700  |
| H                                                       | -2.38321500 | 0.38714500  | 0.85248900  |
| H                                                       | -2.42800600 | -0.49171200 | -0.77376100 |
| H                                                       | 1.19353200  | 1.38976100  | -0.52447000 |
| FS7e (:Si(H)CH=CH <sub>2</sub> →:Si=C=CH <sub>2</sub> ) |             |             |             |
| Si                                                      | -0.05259600 | -1.30552000 | -0.00312000 |
| C                                                       | -0.51792600 | 0.33161200  | 0.00031400  |
| H                                                       | 5.36191600  | 1.32966500  | -0.22654900 |
| C                                                       | -0.88055500 | 1.60316900  | 0.00326100  |
| H                                                       | -1.12801800 | 2.13701600  | 0.92272400  |
| H                                                       | -0.95302700 | 2.19125800  | -0.91355500 |
| H                                                       | 5.84636200  | 1.01065000  | 0.23961200  |
| :Si=CH <sub>2</sub>                                     |             |             |             |
| Si                                                      | -0.67787200 | -0.00001400 | 0.00000500  |
| C                                                       | 1.03543000  | -0.00003100 | -0.00004700 |
| H                                                       | 1.63850200  | 0.90911700  | 0.00010400  |
| H                                                       | 1.63912400  | -0.90873600 | 0.00010400  |
| TS (:Si=CH <sub>2</sub> →HSi≡CH)                        |             |             |             |
| Si                                                      | -0.57748800 | -0.10751000 | 0.00000400  |
| C                                                       | 1.09167600  | 0.02887100  | -0.00002800 |
| H                                                       | 2.16799000  | -0.07672000 | 0.00010100  |
| H                                                       | -0.63322100 | 1.40864000  | 0.00001300  |
| FS (:Si=CH <sub>2</sub> →HSi≡CH)                        |             |             |             |
| Si                                                      | -0.52174500 | -0.12262900 | -0.00004700 |
| C                                                       | 1.10582700  | 0.14402300  | 0.00008100  |
| H                                                       | 2.13900500  | -0.16580000 | 0.00012900  |
| H                                                       | -1.46953400 | 1.01846700  | 0.00004700  |
| TS (:Si=CH <sub>2</sub> →SiC+H <sub>2</sub> )           |             |             |             |
| Si                                                      | 0.14511800  | -0.41776900 | -0.00002200 |
| C                                                       | -1.20376300 | 0.62260400  | 0.00004600  |
| H                                                       | 2.34489800  | 1.33395600  | -0.00058000 |
| H                                                       | 2.84602800  | 0.77918100  | 0.00061000  |
| FS (:Si=CH <sub>2</sub> →SiC+H <sub>2</sub> )           |             |             |             |
| Si                                                      | -0.11330100 | -0.19864100 | -0.00003200 |
| C                                                       | -1.66017700 | 0.36585000  | 0.00006000  |
| H                                                       | 5.70033600  | 0.65774300  | -0.00029500 |
| H                                                       | 5.84694900  | -0.07186500 | 0.00038200  |
| TS (:Si(H)Pr→Si+Propane)                                |             |             |             |

|                                      |             |             |             |
|--------------------------------------|-------------|-------------|-------------|
| Si                                   | -2.09294700 | -0.29381200 | -0.05894000 |
| C                                    | 1.38631300  | 0.55681600  | -0.30417700 |
| H                                    | 1.32894600  | 0.62294100  | -1.39685700 |
| H                                    | 2.01633000  | 1.39084100  | 0.02538600  |
| C                                    | 2.02429400  | -0.77264600 | 0.10402300  |
| H                                    | 3.01620800  | -0.88725700 | -0.33986900 |
| H                                    | 2.13493300  | -0.83865800 | 1.19107500  |
| H                                    | 1.41391200  | -1.61953900 | -0.22479200 |
| C                                    | -0.01917100 | 0.76181100  | 0.29625200  |
| H                                    | -0.01910500 | 0.62098400  | 1.37727600  |
| H                                    | -0.51745600 | -0.20260700 | -0.45381000 |
| H                                    | -0.42112000 | 1.75077600  | 0.07015600  |
| FS (:Si(H)Pr→Si+Propane)             |             |             |             |
| Si                                   | -2.46795800 | -0.25615200 | -0.05522700 |
| C                                    | 1.62969400  | 0.53396600  | -0.27814300 |
| H                                    | 1.62939000  | 0.66236700  | -1.36564300 |
| H                                    | 2.29191300  | 1.30942000  | 0.12387700  |
| C                                    | 2.17444500  | -0.85065600 | 0.07939900  |
| H                                    | 3.18206000  | -0.99473900 | -0.31904500 |
| H                                    | 2.22274600  | -0.98848300 | 1.16418500  |
| H                                    | 1.53848200  | -1.64171300 | -0.32975500 |
| C                                    | 0.21623600  | 0.78250300  | 0.26108400  |
| H                                    | 0.16037900  | 0.66631700  | 1.34528600  |
| H                                    | -0.43463500 | 0.00376300  | -0.22617200 |
| H                                    | -0.16117200 | 1.77432800  | 0.00640900  |
| Propane                              |             |             |             |
| C                                    | 0.00000000  | 0.58579800  | -0.00000100 |
| H                                    | -0.00000300 | 1.24498500  | 0.87556500  |
| H                                    | 0.00000800  | 1.24474200  | -0.87574200 |
| C                                    | -1.27711800 | -0.25968300 | 0.00000400  |
| H                                    | -2.17360700 | 0.36674800  | -0.00027600 |
| H                                    | -1.32231900 | -0.90569000 | -0.88273500 |
| H                                    | -1.32253600 | -0.90521600 | 0.88307200  |
| C                                    | 1.27711700  | -0.25968300 | 0.00000500  |
| H                                    | 1.32231000  | -0.90570700 | -0.88272600 |
| H                                    | 1.32254300  | -0.90519900 | 0.88308400  |
| H                                    | 2.17360900  | 0.36674500  | -0.00029300 |
| TS (Propane→Propene+H <sub>2</sub> ) |             |             |             |
| C                                    | 0.00267400  | 0.41778700  | -0.08018000 |
| H                                    | -0.15776600 | 1.46288700  | -0.30877500 |
| H                                    | -1.89163600 | 1.56352700  | 0.36384900  |
| C                                    | 1.38917400  | -0.08987300 | 0.04454400  |
| H                                    | 2.12827800  | 0.55747000  | -0.43269200 |
| H                                    | 1.67292500  | -0.19432800 | 1.10230400  |

|                                      |             |             |             |
|--------------------------------------|-------------|-------------|-------------|
| H                                    | 1.45472700  | -1.10335200 | -0.37150300 |
| C                                    | -1.16079800 | -0.43366700 | -0.03910900 |
| H                                    | -1.60302500 | -0.66684000 | 0.93001900  |
| H                                    | -1.00243600 | -1.39306900 | -0.56210400 |
| H                                    | -1.98737100 | 0.40822200  | -0.27262300 |
| FS (Propane→Propene+H <sub>2</sub> ) |             |             |             |
| C                                    | 0.15055200  | -0.11965300 | -0.22143900 |
| H                                    | -0.54782300 | -0.80886400 | -0.69360800 |
| H                                    | -6.59083800 | -1.04640400 | -0.03343300 |
| C                                    | 1.49923700  | -0.68152100 | 0.11932400  |
| H                                    | 1.40899000  | -1.52953200 | 0.80725700  |
| H                                    | 2.00605800  | -1.05698000 | -0.77654200 |
| H                                    | 2.14096200  | 0.06998200  | 0.58542200  |
| C                                    | -0.24174900 | 1.13167400  | 0.00762900  |
| H                                    | -1.23350000 | 1.47531700  | -0.26403200 |
| H                                    | 0.41674600  | 1.85772000  | 0.47572700  |
| H                                    | -6.04883100 | -0.94424400 | 0.46612800  |
| Propene                              |             |             |             |
| C                                    | 0.13366700  | -0.45370600 | -0.00008100 |
| H                                    | 0.16620300  | -1.54213100 | 0.00003400  |
| C                                    | -1.23399100 | 0.16269700  | 0.00000300  |
| H                                    | -1.80799900 | -0.15468400 | -0.87768400 |
| H                                    | -1.80661800 | -0.15207300 | 0.87956800  |
| H                                    | -1.18247900 | 1.25411300  | -0.00158400 |
| C                                    | 1.28162800  | 0.22039200  | -0.00000300 |
| H                                    | 2.23925600  | -0.28791400 | 0.00024100  |
| H                                    | 1.30381600  | 1.30638600  | -0.00008900 |
| TS (Propene→Allene+H <sub>2</sub> )  |             |             |             |
| C                                    | -0.03731200 | 0.27297500  | -0.11777200 |
| H                                    | 0.22852700  | 1.43455300  | -0.09057700 |
| C                                    | 1.18748600  | -0.33916300 | -0.02842900 |
| H                                    | 2.08530500  | 0.24465600  | -0.17609100 |
| H                                    | 1.12480700  | 1.53159500  | 0.76443300  |
| H                                    | 1.28930200  | -1.42178600 | 0.01199900  |
| C                                    | -1.31921500 | -0.14020000 | 0.01998600  |
| H                                    | -2.13441000 | 0.41335800  | -0.42851800 |
| H                                    | -1.57928400 | -0.96405000 | 0.67604000  |
| FS (Propene→Allene+H <sub>2</sub> )  |             |             |             |
| C                                    | -0.01472800 | -0.31293300 | 0.00004200  |
| H                                    | -0.01886800 | 3.11530300  | -0.00417300 |
| C                                    | 1.28744700  | -0.36648000 | 0.00004700  |
| H                                    | 1.88863900  | 0.53578800  | 0.05418300  |
| H                                    | 0.34562500  | 3.76446700  | 0.00339900  |
| H                                    | 1.81273100  | -1.31486000 | -0.05458600 |

|                                                 |             |             |             |
|-------------------------------------------------|-------------|-------------|-------------|
| C                                               | -1.31717000 | -0.25868000 | 0.00008400  |
| H                                               | -1.87851100 | -0.18193400 | -0.92589400 |
| H                                               | -1.88291300 | -0.29020300 | 0.92603000  |
| TS (propene→Me <sub>2</sub> C:)                 |             |             |             |
| C                                               | -0.08178200 | -0.59434700 | -0.11764200 |
| H                                               | -0.87812300 | -0.51278000 | 0.95435600  |
| C                                               | 1.21928600  | 0.14016900  | 0.01610900  |
| H                                               | 1.88555500  | -0.34600300 | 0.73345300  |
| H                                               | 1.71968700  | 0.03830900  | -0.95472600 |
| H                                               | 1.14830700  | 1.21694300  | 0.24808300  |
| C                                               | -1.21702700 | 0.20746300  | -0.03759600 |
| H                                               | -2.20678400 | -0.22460000 | -0.18466800 |
| H                                               | -1.19149800 | 1.30841800  | 0.03827200  |
| FS (propene→Me <sub>2</sub> C:)                 |             |             |             |
| C                                               | -0.02985500 | -0.58980200 | -0.24063200 |
| C                                               | 1.21336000  | 0.15382500  | 0.01343600  |
| H                                               | 1.40859800  | -0.16600900 | 1.05761500  |
| H                                               | 2.07389500  | -0.20670700 | -0.55482700 |
| H                                               | 1.16450200  | 1.25668300  | 0.02363000  |
| C                                               | -1.23245000 | 0.23136400  | -0.03365000 |
| H                                               | -2.11593800 | -0.33801400 | 0.26428000  |
| H                                               | -1.13003200 | 1.16129300  | 0.55231700  |
| H                                               | -1.43119000 | 0.53487000  | -1.08196300 |
| TS (Me <sub>2</sub> C:→propyne+H <sub>2</sub> ) |             |             |             |
| C                                               | 0.05177700  | -0.45715000 | -0.00001400 |
| C                                               | 1.13849300  | 0.24383400  | -0.00000500 |
| H                                               | 2.23822400  | -0.50625300 | 0.42678000  |
| H                                               | 2.23825500  | -0.50624400 | -0.42673700 |
| H                                               | 1.58583200  | 1.22848400  | 0.00000600  |
| C                                               | -1.33668500 | 0.08508400  | 0.00000100  |
| H                                               | -1.87284200 | -0.31336600 | 0.86788200  |
| H                                               | -1.43801800 | 1.18032100  | -0.00010200 |
| H                                               | -1.87296500 | -0.31354600 | -0.86772100 |
| FS (Me <sub>2</sub> C:→propyne+H <sub>2</sub> ) |             |             |             |
| C                                               | -0.60608400 | 0.58564100  | -0.00347100 |
| C                                               | 0.49471500  | 1.06893800  | -0.00493700 |
| H                                               | 4.81637600  | -2.70606600 | 0.38022400  |
| H                                               | 4.77751300  | -2.73293400 | -0.36249600 |
| H                                               | 1.46705700  | 1.49669900  | -0.00689200 |
| C                                               | -1.93934200 | -0.00173700 | -0.00107100 |
| H                                               | -2.08435800 | -0.63856100 | 0.87599000  |
| H                                               | -2.70878600 | 0.77511300  | 0.01535300  |
| H                                               | -2.09797600 | -0.61462900 | -0.89269900 |
